# Supplementary material for: ECOMAN: an open-source package for geodynamic and seismological modelling of mechanical anisotropy
Source: Copernicus journal article supplement (doi:10.5194/se-15-1241-2024), 2024-10-07
Supplement: Supplementary file 1 [file se-15-1241-2024-supplement.zip]

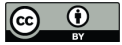

## *Supplement of*

# **ECOMAN: an open-source package for geodynamic and seismological modelling of mechanical anisotropy**

**Manuele Faccenda et al.**

*Correspondence to:* Manuele Faccenda ([manuele.faccenda@unipd.it](mailto:manuele.faccenda@unipd.it)) and Brandon P. VanderBeek ([brandonpaul.vanderbeek@unipd.it](mailto:brandonpaul.vanderbeek@unipd.it))

- [se-15-1241-2024-supplement-title-page.pdf](#)
- D-REX\_S\_test
  - D-REX\_S\_test.f90
  - README
  - RUN
  - bash\_compile
  - drexs
  - drexs\_input.dat
  - dsyevc3.f
  - dsyevh3.f
  - dsyevq3.f
  - dsytrd3.f
  - loadsave.f90
  - module.f90
  - read\_input\_file.f90
  - readfunct.f90
  - rotmat.f90
  - strainLPO.f90

The copyright of individual parts of the supplement might differ from the article licence.
